# Supplementary material
Source: HighWire-hosted journal article supplement (https://bmjopen.bmj.com/content/14/10/e088462)
Supplement: inline-supplementary-material-2 [file inline-supplementary-material-2.pdf]

Sup Table 1

The results from table show that the correlation coefficients between input and output indicators are both positive and highly significant.

| S1 Correlation analysis of the inputs and outputs                                |                                                                    |                |                                   |                                                                                  |                               |                      |                                                 |                                        |                      |
|----------------------------------------------------------------------------------|--------------------------------------------------------------------|----------------|-----------------------------------|----------------------------------------------------------------------------------|-------------------------------|----------------------|-------------------------------------------------|----------------------------------------|----------------------|
|                                                                                  | Chinese medicine practitioners (including assistant practitioners) | TCM pharmacist | Number of beds (actual open beds) | The total value of more than 10,000 RMB of TCM diagnosis and treatment equipment | Total number of consultations | Number of discharges | Number of prescriptions of TCM decoction pieces | Income of TCM medical service projects | Bed utilization rate |
| Chinese medicine practitioners (including assistant practitioners)               | 1                                                                  |                |                                   |                                                                                  |                               |                      |                                                 |                                        |                      |
| TCM pharmacist                                                                   | 0.629**                                                            | 1              |                                   |                                                                                  |                               |                      |                                                 |                                        |                      |
| Number of beds (actual open beds)                                                | 0.840**                                                            | 0.610**        | 1                                 |                                                                                  |                               |                      |                                                 |                                        |                      |
| The total value of more than 10,000 RMB of TCM diagnosis and treatment equipment | 0.443**                                                            | 0.288*         | 0.451**                           | 1                                                                                |                               |                      |                                                 |                                        |                      |
| Total number of consultations                                                    | 0.853**                                                            | 0.698**        | 0.781**                           | 0.387**                                                                          | 1                             |                      |                                                 |                                        |                      |
| Number of discharges                                                             | 0.827**                                                            | 0.524**        | 0.888**                           | 0.416**                                                                          | 0.791**                       | 1                    |                                                 |                                        |                      |
| Number of prescriptions of TCM decoction pieces                                  | 0.711**                                                            | 0.610**        | 0.697**                           | 0.338**                                                                          | 0.789**                       | 0.654**              | 1                                               |                                        |                      |
| Income of TCM medical service projects                                           | 0.489**                                                            | 0.396**        | 0.616**                           | 0.252*                                                                           | 0.617**                       | 0.560**              | 0.501**                                         | 1                                      |                      |
| Bed utilization rate                                                             | 0.299*                                                             | 0.143          | 0.330**                           | 0.22                                                                             | 0.229                         | 0.477**              | 0.134                                           | 0.053                                  | 1                    |

Note: \*\*\*,\*\* and \* indicate the significant p value at the 1%,5% and 10%.
