# Supplementary material
Source: HighWire-hosted journal article supplement (https://bmjopen.bmj.com/content/14/10/e088462)
Supplement: inline-supplementary-material-3 [file inline-supplementary-material-3.pdf]

Sup Table 2

The Table displays the distribution of efficiency scores among the sample hospitals.

| S2 Distribution of the efficiency scores for the sample hospitals |        |        |         |         |        |       |
|-------------------------------------------------------------------|--------|--------|---------|---------|--------|-------|
| Efficiency                                                        | 1      | >0.9   | 0.8-0.9 | 0.7-0.8 | <0.7   | Mean  |
| TE                                                                | 11     | 10     | 13      | 13      | 21     | 0.788 |
|                                                                   | 16.18% | 14.71% | 19.12%  | 19.12%  | 30.88% |       |
| PTE                                                               | 28     | 11     | 8       | 10      | 11     | 0.876 |
|                                                                   | 41.18% | 16.18% | 11.76%  | 14.71%  | 16.18% |       |
| SE                                                                | 12     | 32     | 11      | 10      | 3      | 0.903 |
|                                                                   | 17.65% | 47.06% | 16.18%  | 14.71%  | 4.41%  |       |
